# Supplementary material
Source: PubMed Central journal article supplement (PMC2712212)
Supplement: mmc1.pdf [file mmc1.pdf]

Biophysical Journal, Volume 96

**Supporting Material**

**Molecular Renormalization Group Coarse-Graining of Polymer Chains:  
Application to Double-Stranded DNA**

Alexey Savelyev and Garegin A. Papoian

Supplemental Information: Molecular Renormalization  
Group Coarse-Graining of Polymer Chains: Application  
to Double-Stranded DNA

Alexey Savelyev<sup>1†</sup> and Garegin A. Papoian<sup>2†</sup>

<sup>†</sup>Department of Chemistry, University of North Carolina, Chapel Hill

<sup>1</sup>Email: alexsav@unc.edu

<sup>2</sup>Correspondence should be addressed to GAP. Email: gpapoian@unc.edu

## Supplemental Materials

|       | Intra-strand |       | Inter-strand ( $f_{an}$ ) |        |       |        |        |        |        |        |        |         |        |
|-------|--------------|-------|---------------------------|--------|-------|--------|--------|--------|--------|--------|--------|---------|--------|
|       | Bond         | Angle | 5p                        | 4p     | 3p    | 2p     | 1p     | bp     | 1m     | 2m     | 3m     | 4m      | 5m     |
| $K_1$ | 2.475        | 10.1  | 0.29                      | 0.06   | 0.053 | 0.0064 | 0.69   | 2.68   | 0.158  | 0.0005 | 0.0007 | 0.0005  | 0.095  |
| $K_2$ | -0.983       | 1.99  | 0.06                      | -0.012 | -0.04 | -0.032 | -0.137 | -0.085 | -0.052 | -0.032 | -0.017 | -0.0032 | -0.018 |
| $K_3$ | 0.126        | 4.99  | 0.005                     | 0.0007 | 0.004 | 0.0057 | 0.028  | 0.025  | 0.005  | 0.005  | 0.0025 | 0.0013  | 0.0047 |

Table 1: Optimized parameters for the coarse-grained DNA Hamiltonian defined by polynomials in Eqs.(2) are shown. Intra-strand bond and bending angle potentials describe the polymeric interactions within each of the DNA strands. Inter-strand interactions are described by the  $f_{an}$  potential representing the set of constraints among two polynucleotides to maintain the desired DNA structure (see Fig. 1 in the main text). These include, in particular, base pair interactions (denoted as “bp”), as well as the interactions among the given bead located on one strand and a series of beads located on the other strand (denoted as “1..5p” and “1..5m” and corresponding to beads  $[(N \pm 1..5) - i]$  in notations of Fig. 1). Parameters  $K_1$  and  $K_2$  and  $K_3$  for all types of interactions, aside from the bending angle potential, are given in units of [kcal/mol·Å<sup>-2</sup>], [kcal/mol·Å<sup>-3</sup>] and [kcal/mol·Å<sup>-4</sup>], respectively. Analogous parameters for bending angle potential are measured in units of [kcal/mol·rad<sup>-2</sup>], [kcal/mol·rad<sup>-3</sup>] and [kcal/mol·rad<sup>-4</sup>], respectively.
